# Supplementary material for: A first-in-class precision antibody conjugate targeting EGFR, mTOR, and PI3K to treat head and neck cancers
Source: Research Square preprint supplement (doi:10.21203/rs.3.rs-9655840/v1), 2026-05-14
Supplement: Supplementary file 1 [file 81f3a108d32b55768d69cc76.docx]

Electronic Supplementary Information for:

**A first-in-class precision drug antibody conjugate targeting EGFR, mTOR, and PI3K to treat head and neck cancers**

Xiaoyi Li1,Meghri Katerji2,3,4, Lily M. Klapper4, Siddharth Matikonda1, Nick Brill-Edwards4, Aamna Siddiqui4,Chathuranga Rathnamalala1, Mo Yang1, Jungwuk Lee4, Ryan Bensen4, Lai Thang5, Simone Difilippantonio5, Julien Dugal-Tessier,6 Shengzong Liang,6 John Brognard2,3,4*, Martin Schnermann1 *

1 Chemical and Biological Laboratory, National Cancer Institute, National Institutes of Health, Frederick, MD 21702.

2 Department of Surgery and Pharmacology, State University of New York, Upstate Medical University, Syracuse, NY 13210.

3 Cancer Therapeutics Program, State University of New York, Upstate Medical University, Syracuse, NY 13210.

4 Laboratory of Cell and Developmental Signaling, National Cancer Institute, National Institutes of Health, Frederick, MD 21702.

5 Animal Technical Support, Laboratory Animal Sciences Program, Leidos Biomedical Research, Frederick National Laboratory for Cancer Research, Frederick, MD 21702.

6 NJ Bio Inc., Princeton, NJ 08540.s

***Corresponding authors

# Synthesis

Compounds **S1-1**, **BGT-VC** were prepared by ChemMaster Inc.

**S1-1.** To a solution of BGT226 (150 mg, 0.28 mmol) in a 1:1 mixture of methanol and methylene chloride (20 mL) was added Fmoc-Val-Cit-PAB-PNP (119 mg, 0.25 mmol). The reaction mixture was incubated at 50 °C for 2 h, then stirred at room temperature overnight. The reaction progress was monitored by LC/MS. Upon completion, the solvent was removed under reduced pressure, and the resulting residue was triturated with methylene chloride to afford the desired product **S1-1** as an off-white solid (220 mg, 76% yield). 1H NMR (300 MHz, Methanol-*d4*) δ 9.45 (s, 1H), 8.59 (s, 1H), 7.93-7.83 (m, 4H), 7.65-7.53 (m, 5H), 7.53-7.30 (m, 9H), 7.1-7.06 (m, 6H), 6.86 (s, 1H), 6.64 (d, *J* = 9Hz, 1H), 6.49 (d, *J* = 9Hz, 1H), 5.12 (s, 2H), 4.89 (s,2H), 4.21-3.98 (m, 3H), 3.66 (s, 3H), 3.48 (d, *J* = 6Hz, 8H), 3.10-2.81 (m, 7H), 1.88-1.31 (m, 5H), 0.71 (m, 6H). ESI-MS *m/z* [M+H]+ Calc’d for C62H63F3N11O9, 1162.47; found 1162.5.

**BGT-VC**. To compound **S1-1** (184 mg, 0.17 mmol) in anhydrous DMF (3.0 mL) was added piperidine (0.60 mL) and stirred at room temperature for 30 minutes. DMF was removed by N2 and the residue was purified by silica-gel column chromatography (5 − 30 % CH3OH in CH2Cl2) to give the free base (140 mg, yield 94%). The free base was then dissolved in anhydrous CH2Cl2 (5.0 mL), to which 2,8-oxocanedione (20 mg) was added. The reaction was stirred at room temperature overnight. After evaporation of the solvent, the crude residue was purified by silica-gel preparative chromatography (0 − 10 % CH3OH in CH2Cl2) to give compound **BGT-VC** as off-white crystals (85 mg, yield 53%). 1H NMR (300 MHz, Methanol-*d4*) δ 8.31 (s, 1H), 7.68 (d, *J =* 9 Hz, 1H), 7.61 (s, 1H), 7.38 (s, 1H), 7.30 (t, *J* = 9Hz, 2H), 7.15 (d, *J* = 3Hz, 2H), 7.09 (d, *J* = 6Hz, 1H), 6.88 (s, 4H), 6.62 (s, 1H), 6.24 (d, J= 9Hz, 1H), 4.64 (s, 2H), 4.07 (t, *J* = 9Hz, 1H), 3.63 (d, *J* = 9Hz, 1H), 3.50 (s, 3H), 2.89 (s, 3H), 2.67 (s, 2H), 2.55 (s, 4H), 1.75 (d, *J* = 9Hz, 4H), 1.52 (m, 2H), 1.41 (m, 2H), 1.14 (m, 8H), 0.80 (m, 2H), 0.46 (m, 7H). TOF-MS m/z [M+H]+ Calc’d for C54H63F3N11O10 = 1082.47. Found 1082.6. ESI-MS *m/z* [M+H]+ Calc’d for C54H63F3N11O10, 21082.47; found 1082.6.

**BGT-VC-NHS.** To a 10 mL microwave vial, **BGT-VC** (3.2 mg, 0.003 mmol), TSTU (3.2 mg, 0.010 mmol, 3 eq) and DIPEA (2.0 μL, 0.010 mmol, 3 eq) were added sequentially to anhydrous DMF (300 μL). The progress of the reaction was monitored by LC/MS. After 1 h, the reaction was complete. Diethyl ether (5.0 mL) was added, and the mixture was transferred to a 15 mL tube, sonicated for 1 min and then centrifuged at 3600 rpm for 5 min. The supernatant was discarded, and the solid was washed with ethyl acetate (2 × 5 mL) and diethyl ether (1 × 5 mL). The solid was dried to afford the **BGT-VC-NHS,** which was used without further purification and stored at -20 °C in the dark.

**BGT-PVC-Mal.** **BGT-VC** (4.2 mg, 0.0045 mmol) and PUREBRIGHT® MA-P12-PS(8.1 mg, 0.0049 mmol) were dissolved in anhydrous DMF (0.30 ml). To this solution, DIPEA (1.6 μl, 0.0089 mmol) was added, and the reaction mixture was stirred at room temperature for 8 hours. The reaction progress was monitored by LC/MS. Upon completion, the crude reaction mixture was purified by reverse-phase column chromatography (10 − 95% MeCN:H2O) to afford **BGT-PVC-Mal** as a white solid (5.2 mg, yield 47%). ESI-MS *m/z* [M+2H]2+ Calc’d for C115H177F3N15O40, 1233.35; found 1233.66.s

**BGT226-Cl**. **BGT226** (26.7 mg, 0.050 mmol) was dissolved in anhydrous CH2Cl2 (250 μL). To this, chloromethyl ester (5 μL, 0.050 mmol, 1 eq) and DIPEA (18.1 μL, 0.10 mmol, 2 eq) were added and the reaction mixture was stirred at room temperature for 2 hours. The solvent was removed by evaporation under reduced pressure, and the residue was subjected to silica gel chromatography (0 − 20 % CH3OH in CH2Cl2), affording **BGT226-Cl** as a white solid (26 mg, yield 85%).1H NMR (400 MHz, CDCl3) δ 8.73 (s, 1H), 8.11 (d, J = 8.9 Hz, 1H), 8.02 (d, J = 2.6 Hz, 1H), 7.80 (d, J = 2.5 Hz, 1H), 7.69 (dt, J = 9.0, 2.0 Hz, 2H), 7.54 (d, J = 8.5 Hz, 1H), 7.47 (dd, J = 8.6, 2.6 Hz, 1H), 7.02 (d, J = 2.0 Hz, 1H), 6.65 (d, J = 8.6 Hz, 1H), 5.78 (s, 2H), 3.88 (s, 3H), 3.76 – 3.59 (m, 7H), 3.08 – 2.92 (m, 4H). 13C NMR (101 MHz, CDCl3) δ 163.96, 153.42, 153.16, 152.68, 144.96, 144.58, 136.89, 135.68, 133.37, 132.54, 132.32, 131.59, 129.36, 128.86, 128.74, 128.14, 128.09, 125.96, 125.93, 123.27, 117.15, 115.23, 110.94, 77.34, 77.22, 77.02, 76.70, 70.93, 53.58, 53.10, 44.47, 28.00. HR-ESI-MS *m/z* [M+H]+ Calc’d for C30H27ClF3N6O4+, 627.1729; found 627.1777.

Compound **S3-1** was prepared according to a reported procedure (Peng et al, *European Journal of Medicinal Chemistry* **2022**, *236*, 114344).

**Pip-Glu**. To a solution of sodium borohydride (20 mg, 0.53 mmol) in CH2Cl2 at 0 °C, acetic acid (140 μL, 2.4 mmol) was added dropwise. The resulting mixture was stirred at 0 °C for 30 min, followed by the addition of **Pip-Glu** (46 mg, 0.25 mmol) and a solution of compound **S3-1** (114 mg, 0.26 mmol) in CH2Cl2 (100 μL). The reaction mixture was stirred overnight at 0 °C and monitored by LC/MS. Upon completion, the reaction was neutralized with saturated NaHCO3 to pH 8. The mixture was extracted with CH2Cl2 and the combined organic layers were dried over Na2SO4. The solvent was removed under reduced pressure, and the residue was purified by silica gel chromatography (0 – 10 % MeOH in CH2Cl2), affording **Pip-Glu** as a pale-yellow solid (126 mg, 83 % yield). 1H NMR (400 MHz, CDCl3) δ 7.36 – 7.30 (m, 2H), 6.99 (d, *J* = 8.6 Hz, 2H), 5.40 – 5.32 (m, 2H), 5.31 (d, *J* = 7.3 Hz, 1H), 5.16 (d, *J* = 7.3 Hz, 1H), 4.23 – 4.16 (m, 1H), 3.75 (s, 5H), 2.98 (s, 2H), 2.41 (d, *J* = 50.9 Hz, 3H), 2.11 – 2.05 (m, 9H), 1.94 (d, *J* = 32.9 Hz, 4H), 1.45 (s, 9H). 13C NMR (101 MHz, CDCl3) δ 173.42, 170.09, 169.35, 169.22, 166.81, 156.69, 131.45, 117.16, 99.00, 80.75, 72.67, 71.87, 71.00, 69.11, 61.16, 53.01, 51.44, 40.12, 28.04, 26.56, 20.62, 20.52. HR-ESI-MS *m/z* [M+H]+ Calc’d for C30H42NO12+, 608.2702; found 608.2735.

**S3-2**. To a 10 mL microwave vial, **BGT226-Cl** (125 mg, 0.20 mmol) and **Pip-Glu** (122 mg, 0.20 mmol, 1 eq) were dissolved in anhydrous CH3CN (1.5 mL). Subsequently, NaI (30 mg, 0.20 mmol, 1 eq) and NaHCO3 (20 mg, 0.24 mmol, 1.2 eq) were added and the reaction was stirred at 65 oC. The reaction mixture was monitored using LC/MS and stopped after 8 h. The crude product was concentrated and then dissolved in TFA:CH2Cl2 (1:1, 2.0 mL). After stirring at room temperature 30 min, the solvent was evaporated and the residue was purified by reverse-phase column chromatography (10 − 95% MeCN:H2O, 0.05% FA) to afford **S3-2** as a white solid (29 mg, yield 13%). 1H NMR (400 MHz, CD3CN) δ 8.79 (d, J = 3.5 Hz, 1H), 8.04 (t, J = 7.7 Hz, 2H), 7.91 (d, J = 3.9 Hz, 1H), 7.84 – 7.70 (m, 3H), 7.57 (d, J = 8.6 Hz, 1H), 7.52 (d, *J* = 6.6 Hz, 2H), 7.19 – 7.12 (m, 2H), 7.01 (d, *J* = 8.9 Hz, 1H), 6.73 (dd, *J* = 8.3, 3.5 Hz, 1H), 5.49 (d, *J* = 7.7 Hz, 1H), 5.43 (d, *J* = 9.5 Hz, 1H), 5.25 (d, *J* = 9.6 Hz, 1H), 5.18 (d, *J* = 9.7 Hz, 3H), 5.12 (s, 1H), 4.54 (s, 2H), 4.46 (d, *J* = 10.0 Hz, 1H), 3.85 (s, 3H), 3.78 (s, 1H), 3.71 (s, 2H), 3.64 (s, 3H), 3.56 (s, 3H), 3.51 (s, 1H), 3.35 (s, 2H), 3.11 (s, 4H), 2.47 (s, 1H), 2.20 (d, *J* = 39.8 Hz, 4H), 1.99 (d, *J* = 5.0 Hz, 9H), 1.96 (s, 1H). 13C NMR (126 MHz, CD3CN) δ 176.28, 170.52, 170.39, 167.92, 166.39, 164.54, 158.90, 154.12, 153.90, 152.40, 145.53, 144.86, 137.69, 135.40, 135.32, 134.86, 133.94, 133.49, 131.87, 129.49, 129.29, 128.84, 128.52, 127.15, 127.04, 125.90, 125.37, 124.39, 123.19, 121.89, 117.70, 115.65, 111.36, 98.21, 72.53, 71.87, 71.32, 69.77, 63.09, 55.72, 53.89, 53.63, 53.22, 45.48, 39.20, 28.08, 23.60, 23.32, 20.68, 20.49. HR-ESI-MS *m/z* [M+H]2+ Calc’d for C56H60F3N7O162+, 571.7019; found 571.7090.

**S3-3**. To a 2 mL microwave vial, compound **S3-2** (15 mg, 0.013 mmol) and sodium 3-((3-(tert-butoxy)-3-oxopropyl)amino)propane-1-sulfonate (10 mg, 0.040 mmol, 3 eq) were mixed in anhydrous DMF (200 μL). Subsequently, HATU (10 mg, 0.026 mmol, 2 eq) and DIPEA (12 μL, 0.065 mmol, 5 eq) were added and the reaction was heated to 65 oC. The reaction mixture was monitored using LC/MS and completed after 4 h. The crude product was concentrated and then dissolved in TFA:CH2Cl2 (1:1, 1.0 mL). After 30 min, the solvent was dried by N2 and the residue was purified by reverse-phase column chromatography (0 − 95% MeCN:H2O, 0.05% FA) to give **S3-3** as a white solid (13 mg, yield 75%). 1H NMR (500 MHz, MeOD) δ 8.93 (d, *J* = 4.3 Hz, 1H), 8.15 (d, *J* = 8.9 Hz, 1H), 8.10 – 8.03 (m, 2H), 7.95 (s, 1H), 7.90 (dd, *J* = 9.4, 6.0 Hz, 2H), 7.77 – 7.72 (m, 1H), 7.60 (dd, *J* = 13.1, 8.6 Hz, 2H), 7.24 (d, *J* = 8.3 Hz, 2H), 7.16 (d, *J* = 2.3 Hz, 1H), 6.82 (d, *J* = 8.6 Hz, 1H), 5.59 (d, *J* = 7.8 Hz, 1H), 5.51 – 5.38 (m, 3H), 5.29 – 5.17 (m, 3H), 4.82 (s, 1H), 4.65 (s, 1H), 4.58 – 4.53 (m, 1H), 3.92 (s, 3H), 3.80 (d, *J* = 19.1 Hz, 4H), 3.75 – 3.61 (m, 12H), 3.57 (d, *J* = 14.5 Hz, 1H), 3.43 (q, *J* = 10.4 Hz, 1H), 3.27 – 3.11 (m, 6H), 2.93 – 2.86 (m, 2H), 2.45 (d, *J* = 11.7 Hz, 1H), 2.24 (s, 2H), 2.19 – 2.05 (m, 4H), 2.03 (s, 8H). 13C NMR (126 MHz, MeOD) δ 175.44, 169.98, 169.76, 169.50, 167.45, 164.05, 158.49, 153.85, 153.48, 151.70, 144.48, 143.74, 137.15, 135.34, 134.35, 133.95, 132.79, 132.48, 129.93, 129.56, 128.80, 128.09, 126.55, 126.27, 125.91, 124.48, 123.66, 122.31, 120.82, 116.99, 115.07, 110.43, 97.45, 73.60, 71.73, 70.92, 69.26, 66.24, 55.15, 54.06, 53.21, 52.99, 52.85, 51.96, 44.64, 44.12, 38.21, 35.13, 34.94, 26.88, 24.74, 23.14, 22.44, 19.08, 18.98. HR-ESI-MS *m/z* [M+2H]2+ Calc’d for C61H72F3N9O18S2+, 653.7329; found 653.7334.

**BGT-BAC-Glu**. To a 10 mL microwave vial, compound **S3-3** (13 mg, 0.010 mmol) was dissolved in ice-cold methanol (2.0 mL). To this solution, lithium hydroxide (2.6 mg, 0.11 mmol) dissolved in water (1.0 mL) was added dropwise. The mixture was stirred at 0 oC for 35 min. Upon completion, the reaction was quenched with 6.4 μL of acetic acid and purified by reverse-phase column chromatography (0 − 95% MeCN:H2O, 0.05% FA) to afford **BGT-BAC-Glu** as a white solid (9.7 mg, yield 83%). 1H NMR (400 MHz, 60% CD3CN + 40% D2O) δ 8.78 (s, 1H), 8.05 – 7.95 (m, 2H), 7.83 – 7.67 (m, 4H), 7.51 (d, *J* = 6.1 Hz, 1H), 7.43 (t, *J* = 6.7 Hz, 2H), 7.14 (d, *J* = 8.6 Hz, 2H), 6.92 (s, 1H), 6.71 (d, *J* = 8.6 Hz, 1H), 5.20 (s, 2H), 5.04 (d, *J* = 20.0 Hz, 2H), 4.54 (s, 1H), 4.41 (d, *J* = 16.1 Hz, 2H), 3.78 (s, 6H), 3.64 (s, 2H), 3.53 (d, *J* = 13.9 Hz, 6H), 3.46 (s, 7H), 3.33 (s, 1H), 3.04 (d, *J* = 6.1 Hz, 7H), 2.77 (t, *J* = 6.9 Hz, 2H), 2.15 (s, 1H), 2.04 (d, *J* = 13.0 Hz, 3H). 13C NMR (126 MHz, 60% CD3CN + 40% D2O) δ 175.43, 173.81, 158.42, 153.67, 153.02, 151.78, 144.20, 142.67, 137.11, 134.55, 134.32, 133.96, 133.65, 132.65, 131.33, 129.43, 129.20, 128.15, 127.50, 126.07, 125.85, 124.08, 123.17, 121.91, 119.43, 119.15, 116.60, 114.51, 110.30, 99.21, 75.35, 75.05, 73.10, 72.31, 71.18, 65.68, 54.28, 53.36, 52.24, 47.26, 46.85, 44.32, 43.66, 37.51, 34.41, 27.28, 23.73, 22.43, 21.67. HR-ESI-MS *m/z* [M+H]+ Calc’d for C54H63F3N9O15S+, 1166.4111; found 1166.4163.

**BGT-BAC-Glu-Mal.** To a 10 mL microwave vial, **BGT-BAC-Glu** (7.7 mg, 0.0066 mmol), 3-maleimidopropionic acid N-hydroxysuccinimide ester (2.6 mg, 0.0099 mmol, 1.5 eq) and and DIPEA (2.8 μL, 0.30 mmol, 3 eq) were mixed in anhydrous DMF (100 μL) and stirred at room temperature for 3 hours. The reaction was monitored using LC/MS. Upon completion, DMF was removed by N2 and the reaction mixture was purified by reverse-phase column chromatography (0 − 95% MeCN:H2O, 0.05% FA) to afford **BGT-BAC-Glu-Mal** as a white solid (7.7 mg, yield 89%). 1H NMR (400 MHz, 50% CD3CN + 50% D2O) δ 8.86 (s, 1H), 8.09 (dd, *J* = 18.1, 9.2 Hz, 2H), 7.92 – 7.81 (m, 3H), 7.77 (d, *J* = 8.8 Hz, 1H), 7.57 (d, *J* = 8.7 Hz, 1H), 7.47 (d, *J* = 8.4 Hz, 2H), 7.16 (d, *J* = 8.1 Hz, 2H), 7.01 (s, 1H), 6.78 (s, 1H), 6.75 (d, *J* = 2.9 Hz, 2H), 5.25 (d, *J* = 6.3 Hz, 1H), 5.06 (dd, *J* = 19.6, 9.2 Hz, 2H), 4.63 (s, 1H), 4.48 (s, 2H), 3.96 (d, *J* = 8.7 Hz, 1H), 3.78 – 3.62 (m, 6H), 3.60 (s, 3H), 3.58 – 3.41 (m, 9H), 3.29 (ddd, *J* = 44.4, 13.9, 6.9 Hz, 6H), 3.09 (s, 6H), 2.72 (dt, *J* = 33.6, 7.2 Hz, 3H), 2.48 – 2.20 (m, 3H), 2.18 – 1.98 (m, 3H). 13C NMR (126 MHz, 50% CD3CN + 50% D2O) δ 175.51, 173.52, 172.91, 164.92, 159.71, 154.95, 154.55, 152.97, 145.71, 143.01, 138.41, 136.32, 135.69, 135.42, 135.07, 132.70, 131.71, 129.77, 129.36, 128.96, 127.88, 127.56, 125.48, 124.68, 123.31, 121.05, 120.80, 118.28, 118.07, 117.85, 115.79, 111.75, 100.61, 76.27, 75.93, 74.80, 73.62, 72.26, 66.96, 55.72, 54.59, 53.63, 49.41, 48.71, 47.73, 45.69, 37.86, 35.65, 35.32, 35.10, 28.72, 25.41, 23.81. HR-ESI-MS *m/z* [M+2H]2+ Calc’d for C61H69F3N10O18S+, 659.2227; found 659.2264.

**S4-1**. HcyNMe-Cl was synthesized according to a previously reported procedure (Li et al, *Angew. Chem. Int. Ed.* **2025**, *64*, e202417651). To a 10 mL microwave vial, **HcyNMe-Cl** (103 mg, 0.20 mmol) and **Pip-Glu** (122 mg, 0.20 mmol, 1 eq) were dissolved in anhydrous CH3CN (1.5 mL). Subsequently, NaI (30 mg, 0.20 mmol, 1 eq) and NaHCO3 (20 mg, 0.24 mmol, 1.2 eq) were added and the reaction was stirred at 65 oC. The reaction mixture was monitored using LC/MS and stopped after 6 h. The crude product was concentrated and then dissolved in TFA:CH2Cl2 (1:1, 2.0 mL). After stirring at room temperature 30 min, the solvent was evaporated and the residue was purified by reversed phase HPLC (10 − 95% MeCN:H2O, 0.1% TFA) to afford **S4-1** as a blue solid (35 mg, yield 17%). 1H NMR (400 MHz, MeOD) δ 8.79 (d, *J* = 15.1 Hz, 1H), 7.71 – 7.64 (m, 2H), 7.63 – 7.49 (m, 4H), 7.40 (dd, *J* = 8.3, 2.1 Hz, 1H), 7.32 (s, 1H), 6.96 (s, 4H), 6.71 (d, *J* = 15.0 Hz, 1H), 5.55 – 5.48 (m, 1H), 5.42 (t, *J* = 9.6 Hz, 1H), 5.27 (d, *J* = 48.5 Hz, 1H), 5.13 (s, 2H), 4.45 (q, *J* = 7.2 Hz, 3H), 4.30 (s, 2H), 3.53 (d, *J* = 46.6 Hz, 10H), 2.80 (d, *J* = 20.0 Hz, 5H), 2.27 (d, *J* = 27.6 Hz, 5H), 1.99 (d, *J* = 16.2 Hz, 13H), 1.79 (d, *J* = 13.6 Hz, 6H), 1.11 (t, *J* = 7.4 Hz, 3H). 13C NMR (126 MHz, MeOD) δ 179.30, 174.32, 169.92, 169.76, 169.48, 167.29, 158.12, 152.87, 151.76, 146.23, 146.20, 142.56, 141.43, 134.12, 133.94, 130.41, 128.99, 128.14, 127.89, 122.47, 120.28, 119.66, 117.36, 116.47, 114.91, 113.51, 113.38, 112.74, 105.99, 96.89, 74.24, 71.69, 71.66, 70.89, 69.17, 64.79, 55.27, 51.89, 51.15, 42.87, 37.06, 28.96, 26.71, 24.70, 23.55, 22.14, 21.39, 21.16, 20.12, 19.08, 18.97, 10.19. HR-ESI-MS *m/z* M2+ Calc’d for C57H67N3O152+, 516.7281; found 516.7299.

**S4-2**. To a 2 mL microwave vial, compound **S4-1** (13.5 mg, 0.013 mmol) and sodium 3-((3-(tert-butoxy)-3-oxopropyl)amino)propane-1-sulfonate (10 mg, 0.040 mmol, 3 eq) were mixed in anhydrous DMF (200 μL). Subsequently, HATU (10 mg, 0.026 mmol, 2 eq) and DIPEA (12 μL, 0.065 mmol, 5 eq) were added and the reaction was heated to 65 oC. The reaction mixture was monitored using LC/MS and completed after 4 h. The crude product was concentrated and then dissolved in TFA:CH2Cl2 (1:1, 1.0 mL). After 30 min, the solvent was dried by N2 and the residue was purified by reversed phase HPLC (10 − 95% MeCN:H2O, 0.1% TFA) to give **S4-2** as a blue solid (12 mg, yield 80%). 1H NMR (400 MHz, MeOD) δ 8.80 (d, *J* = 15.3 Hz, 1H), 7.77 – 7.66 (m, 2H), 7.65 – 7.51 (m, 4H), 7.44 (ddd, *J* = 8.3, 6.4, 2.0 Hz, 1H), 7.34 (s, 1H), 7.31 – 6.79 (m, 4H), 6.74 (d, *J* = 14.9 Hz, 1H), 5.54 (d, *J* = 7.4 Hz, 1H), 5.43 (d, *J* = 9.7 Hz, 2H), 5.16 (d, *J* = 9.7 Hz, 3H), 4.63 – 4.39 (m, 4H), 4.30 (s, 1H), 3.84 – 3.45 (m, 14H), 3.14 (t, *J* = 5.9 Hz, 3H), 2.93 – 2.71 (m, 6H), 2.22 (dd, *J* = 37.4, 23.4 Hz, 3H), 2.03 (d, *J* = 1.3 Hz, 10H), 2.00 (d, *J* = 6.6 Hz, 6H), 1.87 – 1.73 (m, 6H), 1.13 (t, *J* = 7.4 Hz, 3H). 13C NMR (126 MHz, MeOD) δ 179.32, 175.43, 169.91, 169.77, 169.50, 167.30, 158.12, 152.90, 151.75, 146.26, 146.20, 142.58, 141.45, 141.42, 134.15, 133.88, 130.28, 128.95, 127.93, 122.52, 120.24, 119.56, 117.25, 116.47, 115.78, 114.94, 113.39, 112.65, 106.06, 96.88, 73.23, 71.70, 71.63, 70.89, 69.18, 65.88, 55.45, 55.39, 53.81, 51.88, 51.13, 44.02, 38.13, 37.37, 35.19, 28.97, 26.80, 26.72, 24.70, 23.55, 23.19, 22.37, 21.18, 20.11, 19.09, 18.98, 10.20. HR-ESI-MS *m/z* M+ Calc’d for C62H78N5O17S+, 1196.5108; found 1196.5177.

**Hcy-BAC-Glu**. To a 10 mL microwave vial, compound **S4-2** (12 mg, 0.010 mmol) was dissolved in ice-cold methanol (2.0 mL). To this solution, lithium hydroxide (2.6 mg, 0.11 mmol) dissolved in water (1.0 mL) was added dropwise. The mixture was stirred at 0oC for 35 min. Upon completion, the reaction was quenched with 6.4 μL of AcOH and purified by reversed phase HPLC (10 − 95% MeCN:H2O, 0.1% TFA) to afford **Hcy-BC-Glu** as a blue solid (9.3 mg, yield 88%). 1H NMR (400 MHz, MeOD) δ 8.78 (dd, *J* = 15.2, 7.9 Hz, 1H), 7.70 (d, *J* = 7.2 Hz, 1H), 7.68 – 7.48 (m, 5H), 7.47 – 7.38 (m, 1H), 7.32 (s, 1H), 7.03 (s, 4H), 6.68 (d, *J* = 15.2 Hz, 1H), 5.12 (d, *J* = 86.7 Hz, 4H), 4.42 (t, *J* = 7.5 Hz, 3H), 4.28 (s, 1H), 3.94 (d, *J* = 9.9 Hz, 2H), 3.64 (td, *J* = 17.7, 9.6 Hz, 8H), 3.47 (s, 5H), 3.11 (s, 2H), 2.84 (d, *J* = 20.8 Hz, 4H), 2.75 (s, 2H), 2.30 (d, *J* = 60.5 Hz, 2H), 2.17 – 1.90 (m, 8H), 1.81 (t, *J* = 6.2 Hz, 6H), 1.09 (t, *J* = 7.4 Hz, 3H). 13C NMR (126 MHz, MeOD) δ 179.28, 175.44, 170.40, 159.16, 153.00, 151.73, 146.22, 146.14, 142.54, 141.42, 133.94, 133.70, 128.99, 128.94, 127.95, 127.80, 122.57, 119.50, 117.88, 116.96, 116.95, 116.72, 115.56, 114.79, 113.33, 106.09, 100.22, 75.94, 75.29, 72.97, 71.44, 65.92, 55.38, 54.02, 51.17, 44.03, 38.19, 37.38, 35.22, 34.92, 28.96, 26.78, 26.70, 24.70, 23.59, 23.19, 22.40, 21.13, 20.08, 10.16. HR-ESI-MS *m/z* M+ Calc’d for C55H70N5O14S+, 1056.4634; found 1056.4661.

**Hcy-BAC-Glu-Mal.** To a 10 mL microwave vial, **Hcy-BAC-Glu** (7.0 mg, 0.0066 mmol), 3-maleimidopropionic acid N-hydroxysuccinimide ester (2.6 mg, 0.0099 mmol, 1.5 eq) and and DIPEA (2.8 μL, 0.30 mmol, 3 eq) were mixed in anhydrous DMF (100 μL) and stirred at room temperature for 3 hours. The reaction was monitored using LC/MS. Upon completion, DMF was removed by N2 and the reaction mixture was purified by reversed phase HPLC (10 − 95% MeCN:H2O, 0.1% TFA) to afford **Hcy-BAC-Glu-Mal** as a blue solid (7.1 mg, yield 89%). 1H NMR (400 MHz, MeOD) δ 8.79 (d, *J* = 15.2 Hz, 1H), 7.73 (d, *J* = 7.3 Hz, 1H), 7.69 – 7.50 (m, 5H), 7.42 (ddd, *J* = 14.9, 8.3, 2.0 Hz, 1H), 7.33 (d, *J* = 6.0 Hz, 1H), 7.10 (s, 4H), 6.88 – 6.77 (m, 2H), 6.69 (d, *J* = 15.2 Hz, 1H), 5.17 (d, *J* = 97.2 Hz, 4H), 4.66 – 4.39 (m, 3H), 4.29 (s, 1H), 3.98 (d, *J* = 10.1 Hz, 2H), 3.77 (d, *J* = 20.6 Hz, 2H), 3.71 – 3.34 (m, 15H), 2.80 (dd, *J* = 33.8, 6.0 Hz, 6H), 2.51 – 2.41 (m, 2H), 2.22 (s, 2H), 2.12 – 1.90 (m, 8H), 1.89 – 1.72 (m, 6H), 1.11 (t, *J* = 7.4 Hz, 3H). 13C NMR (126 MHz, MeOD) δ 179.27, 174.34, 171.69, 170.81, 170.40, 159.16, 152.95, 146.19, 142.53, 141.39, 134.22, 134.17, 133.92, 133.70, 128.97, 128.93, 127.93, 122.69, 122.60, 122.53, 119.70, 117.20, 116.97, 116.73, 114.90, 114.76, 114.59, 113.29, 105.99, 100.23, 75.92, 75.30, 73.37, 73.00, 71.46, 66.07, 55.51, 51.17, 46.68, 45.23, 44.88, 36.95, 35.08, 34.18, 33.86, 28.96, 26.84, 26.74, 24.77, 23.59, 23.15, 22.39, 21.12, 20.08, 10.17. HR-ESI-MS *m/z* M+ Calc’d for C62H75N6O17S+, 1207.4904; found 1207.5048.

# Gating strategy for flow cytometry analysis

Gating strategy for the live and singlet cells used in flow cytometry analysis for (A) Fig.1k, 1m, Extended Data Fig. 4b, 4c, 5c, 8b, 8c and (B) Extended Data Fig. 8a. Each experiment was performed in triplicate, and 10000 cells were counted in each analysis.

# NMR Spectra

**BGT226-Cl.**

**Pip-Glu.**

**S3-2.**

**Compound S3-3.**

**BGT-BAC-Glu.**

**BGT-BAC-Glu-Mal.**

**S4-1.**

**S4-2.**

**Hcy-BAC-Glu.**

**Hcy-BAC-Glu-Mal.**

# HRMS Spectra

**BGT226-Cl.**

**Pip-Glu.**

**S3-2.**

**S3-3.**

**BGT-BAC-Glu.**

**BGT-BAC-Glu-Mal.**

**S4-1.**

**S4-2.**

**Hcy-BAC-Glu.**

**Hcy-BAC-Glu-Mal.**
